# Supplementary material for: Non-migratory monarch butterflies, Danaus plexippus (L.), retain developmental plasticity and a navigational mechanism associated with migration
Source: Oxford University Press journal article supplement (doi:10.1093/biolinnean/blx148), 2017-11-17
Supplement: blx148_suppl_supplementary_table_s1.docx [file blx148_suppl_supplementary_table_s1.docx]

| Primer Name | Sequence |
| --- | --- |
| Dp_Per (F) | AGC CAG TAG CCA TCA ACT CTG TTG |
| Dp_Per (R) | ACT GCG GCT ATA TAG GTT GTA CG |
| Dp_Tim (F) | AGC AAT GAA GAT GAA CTG CCT ACC AC |
| Dp_Tim (R) | TCC TCG TTT GAC GAT CTT CTT TCT CTT C |
| Dp_Cry2 (F) | ACG GAA GGT CTT AAA CCT CCA ATA TGG |
| Dp_Cry2 (R) | TTG ACT CGA CAA GAG TGA TTC TGG C |
| Dp_rpl32 (F) | TTA AGG GCC AGT ACT TGA TGC CC |
| Dp_rpl32 (R) | TCG GCG CAG TAC TTC CTA TTC TG |
